# Supplementary material for: Survival in Advanced-Stage Epithelial Ovarian Cancer Patients with Cardiophrenic Lymphadenopathy Who Underwent Cytoreductive Surgery: A Systematic Review and Meta-Analysis
Source: MDPI journal article supplement (doi:10.3390/cancers13195017), 2021-10-07
Supplement: s1 [file s1]

# Supplementary Materials: Survival in Advanced-Stage Epithelial Ovarian Cancer Patients with Cardiophrenic Lymphadenopathy Who Underwent Cytoreductive Surgery: A Systematic Review and Meta-Analysis

Malika Kengsakul, Gatske M. Nieuwenhuyzen-de Boer, Anna H. J. Bijleveld, Suwasin Udomkarnjananun, Stephen J. Kerr, Christa D. Niehot and Heleen J. van Beekhuizen

**Table S1.** The search strings.

| Source                                         | Via              | Years of coverage | Search string                                                                                                                                                                                                                                                                                                                                                                                                                                                                                                                                                                                                                                                                                                                           | Records |
|------------------------------------------------|------------------|-------------------|-----------------------------------------------------------------------------------------------------------------------------------------------------------------------------------------------------------------------------------------------------------------------------------------------------------------------------------------------------------------------------------------------------------------------------------------------------------------------------------------------------------------------------------------------------------------------------------------------------------------------------------------------------------------------------------------------------------------------------------------|---------|
| Embase                                         | Embase.com       | 1971 - Present    | ('lymphadenopathy'/de OR 'cardiophrenic lymph node'/de OR (lymphadenopath* OR adenopath* OR ((lymph*) NEAR/3 (node*) NEAR/3 (enlarg* OR swollen OR swel*)) OR ((cardiophrenic* OR precardiatic* OR pre-cardiac*) NEAR/3 (lymph*)):ab,ti,kw) AND ('ovary cancer'/exp OR 'ovary tumor'/de OR (((ovar*) NEAR/3 (cancer* OR tumor* OR tumour* OR neoplas* OR carcin*)):ab,ti,kw) NOT ([Conference Abstract]/lim) NOT ((animal/exp OR animal*:de OR nonhuman/de) NOT ('human'/exp))                                                                                                                                                                                                                                                          | 703     |
| Medline ALL                                    | Ovid             | 1946 - Present    | ("Lymphadenopathy"/ OR (lymphadenopath* OR adenopath* OR ((lymph*) ADJ3 (node*) ADJ3 (enlarg* OR swollen OR swel*)) OR ((cardiophrenic* OR precardiatic* OR pre-cardiac*) ADJ3 (lymph*)):ab,ti,kw.) AND (exp "Ovarian Neoplasms"/ OR (((ovar*) ADJ3 (cancer* OR tumor* OR tumour* OR neoplas* OR carcin*)):ab,ti,kw.) NOT (news OR congres* OR abstract* OR book* OR chapter* OR dissertation abstract*).pt. NOT (exp animals/ NOT humans/)                                                                                                                                                                                                                                                                                             | 58      |
| Web of Science Core Collection*                | Web of Knowledge | 1975 - Present    | TS=(((lymphadenopath* OR adenopath* OR ((lymph*) NEAR/2 (node*) NEAR/2 (enlarg* OR swollen OR swel*)) OR ((cardiophrenic* OR precardiatic* OR pre-cardiac*) NEAR/2 (lymph*))) AND (((ovar*) NEAR/2 (cancer* OR tumor* OR tumour* OR neoplas* OR carcin*))) NOT ((animal* OR rat OR rats OR mouse OR mice OR murine OR dog OR dogs OR canine OR cat OR cats OR feline OR rabbit OR cow OR cows OR bovine OR rodent* OR sheep OR ovine OR pig OR swine OR porcine OR veterinar* OR chick* OR zebrafish* OR baboon* OR nonhuman* OR primate* OR cattle* OR goose OR geese OR duck OR macaque* OR avian* OR bird* OR fish*) NOT (human* OR patient* OR women OR woman OR men OR man))) AND DT=(Article OR Review OR Letter OR Early Access) | 41      |
| Cochrane Central Register of Controlled Trials | Wiley            | 1992 - Present    | ((lymphadenopath* OR adenopath* OR ((lymph*) NEAR/3 (node*) NEAR/3 (enlarg* OR swollen OR swel*)) OR ((cardiophrenic* OR precardiatic* OR pre-cardiac*) NEAR/3 (lymph*)):ab,ti,kw) AND (((ovar*) NEAR/3 (cancer* OR tumor* OR tumour* OR neoplas* OR carcin*)):ab,ti,kw)                                                                                                                                                                                                                                                                                                                                                                                                                                                                | 3       |
| Google Scholar                                 |                  |                   | 'pre cardiac lymph' lymphadenopathy cardiophrenic lymph  'ovarian cancer tumor tumour carcinoma neoplasm swollen enlarge enlargement                                                                                                                                                                                                                                                                                                                                                                                                                                                                                                                                                                                                    | 152     |

**Table S2.** Quality assessment of the included studies using the Newcastle-Ottawa Quality Assessment Scale.

| Authors                    | Selection<br>(From total of ●●●●) | Comparability<br>(From total of ●●) | Outcome<br>(From total of ●●●) |
|----------------------------|-----------------------------------|-------------------------------------|--------------------------------|
| Holloway J. B. et al. 1997 | ●●●●                              | ●●                                  | ●●●                            |
| Kolev V. et al. 2010       | ●●●●                              | ●●                                  | ●●●                            |
| Raban O. et al. 2015       | ●●●●                              | ●●                                  | ●●                             |
| Kim H. T. et al. 2016      | ●●●●                              | ●●                                  | ●●                             |
| Cowan R. A. et al. 2017    | ●●●●                              | ●●                                  | ●●●                            |
| McIntosh J. L. et al. 2017 | ●●●●                              | ●●                                  | ●●●                            |
| Luger K. A. et al. 2020    | ●●●●                              | ●●                                  | ●●●                            |

|                                 |      |    |     |
|---------------------------------|------|----|-----|
| Mert I. et al. 2018             | •••• | •• | ••  |
| Lee E. O. I. et al. 2018        | •••• | •• | ••  |
| Nuruzzaman Md. S. H et al. 2018 | •••• | •• | ••  |
| Salehi S. et al. 2018           | •••• | •• | ••  |
| Lopes A. et al. 2019            | •••• | •• | ••• |
| Prader S. et al. 2019           | •••• | •• | ••• |
| Pinelli C. et al. 2019          | •••• | •• | ••  |
| Oommen I. et al. 2020           | •••• | •• | ••• |

Table S3. Review of literatures.

| Reference No. | Studies                    | Study design         | Patient<br>s<br>(Enlarged<br>CPLN) | FIGO                       | Study center                                | Definition of<br>CPLN<br>adenopathy                         | Objective                                                                                                                                        | Results                                                                                                                                                                                                                                                                                                                                                                                                                                                                   |
|---------------|----------------------------|----------------------|------------------------------------|----------------------------|---------------------------------------------|-------------------------------------------------------------|--------------------------------------------------------------------------------------------------------------------------------------------------|---------------------------------------------------------------------------------------------------------------------------------------------------------------------------------------------------------------------------------------------------------------------------------------------------------------------------------------------------------------------------------------------------------------------------------------------------------------------------|
| 9             | Holloway J. B. et al. 1997 | Retrospective cohort | 78 (9)                             | II, III, recurrent stage I | Royal Marsden NHS, UK                       | > 5 mm. in short axis diameter on CT scan.                  | To identify progression free survival (PFS) and overall survival                                                                                 | The presence of CPLN enlargement is a significant adverse prognostic factor for both PFS and OS. The diagnosis of involved CPLN is important as it can define patients having stage IV as opposed to stage III disease.                                                                                                                                                                                                                                                   |
| 22            | Kolev V. et al. 2010       | Retrospective cohort | 212 (92)                           | IIIA-IV                    | Memorial Sloan Kettering Cancer Center      | >5 mm. on the largest perpendicular measurements on CT scan | To determine prognostic significance of enlarged supradiaphragmatic nodes (SdLNs) noted on preoperative CT scan                                  | All patients underwent PDR without SdLNs. 92 patients had SdLNs adenopathy. Median survival was 50 months for patients without adenopathy and 45 months for patients with adenopathy (P=0.09). In optimal cytoreduction group, median survival was 55 months for patients without adenopathy and 50 months for patient with SdLNs adenopathy. 73% were optimally debulked. There was no difference in the nodal size distribution based on cytoreductive status (P=0.36). |
| 33            | Raban O. et al. 2015       | Retrospective cohort | 72 (31)                            | III                        | Rabin medical Center, Israel                | >10 mm. in short axis diameter on CT scan                   | To examine progression free interval and overall survival                                                                                        | No difference between groups in optimal cytoreduction rate.<br>The median PFS for patients with CPLN was 9.0 vs 24 months (p =0.0097) and overall survival OS was 31.7 vs 61.3 months (p =0.001).                                                                                                                                                                                                                                                                         |
| 23            | Kim H. T. et al. 2016      | Retrospective cohort | 31 (31)                            | III-IV                     | Seoul National University Hospital, Korea   | >7mm. in short axis diameter on CT scan                     | To determine whether the preoperative diameter of CPLN the short and long axes, determined via CT scan, predicts pathological proved metastasis. | All patients with primary advanced ovarian cancer had CPLN dissection.<br>The probability of detecting CPLN metastasis was approximately 85% when the short axis of the CPLN was > 7mm in preoperative CT scans.                                                                                                                                                                                                                                                          |
| 24            | Cowan R. A. et al. 2017    | Retrospective cohort | 54 (54)                            | IIIB-IV                    | Memorial Sloan Kettering Cancer Center, USA | >5 mm. in short axis diameter on CT scan                    | To examining its feasibility, safety, and potential impact on clinical outcome                                                                   | All patients underwent CPLN resection. 94% had CPLN positive for metastasis. 56% were complete cytoreduction. Median PFS was 17.2 months (95%CI 12.6-21.8) and median OS was 70.1 months. (95%CI 51.2-89.0).                                                                                                                                                                                                                                                              |
| 25            | McIntosh J. L. et al. 2017 | Retrospective cohort | 88 (38)                            | III                        | Brigham and women's hospital, USA           | ≥ 5 mm. in short axis diameter on CT scan                   | to identify the optimal size threshold and to assess the prognostic significance of CPLN.                                                        | 5mm. short-axis size threshold was associated with significantly decreased PFS (median 14 months, IQR 11-17 vs 23 months, IQR 12-59; P=0.02) and OS (median 44 months, IQR 27-69 vs 65 months, IQR 45-96; p=0.003). On Cox proportion hazards analysis, CPLN lymphadenopathy was significantly associated with decreased PFS (p=0.02) and OS (P=0.008).                                                                                                                   |
| 26            | Lee O. I. et al. 2018      | Retrospective cohort | 176 (50)                           | IIIB-IVB                   | Yonsei university college of                | F-FDG uptake                                                | To determine prognostic significance of enlarge                                                                                                  | All patients underwent primary debulking surgeries. PFS (p=0.671) and OS (P=0.525) did not differ significantly between patients with PET/CT IV with SdLNM and PET/CT IV other                                                                                                                                                                                                                                                                                            |

|    |                                           |                             |              |             |                                                                                                                                   |                                                                                                                                  |                                                                                                                                                                           |                                                                                                                                                                                                                                                                                                                                                                                                           |
|----|-------------------------------------------|-----------------------------|--------------|-------------|-----------------------------------------------------------------------------------------------------------------------------------|----------------------------------------------------------------------------------------------------------------------------------|---------------------------------------------------------------------------------------------------------------------------------------------------------------------------|-----------------------------------------------------------------------------------------------------------------------------------------------------------------------------------------------------------------------------------------------------------------------------------------------------------------------------------------------------------------------------------------------------------|
|    |                                           |                             |              |             | medicine,<br>South Korea                                                                                                          |                                                                                                                                  | supradiaphragmatic<br>nodes detected<br>(SdLNM) by<br>PET/CT.                                                                                                             | metastases. However, patients with PET/CT IV<br>with SdLNM had significantly decreased PFS (14<br>months, $p<0.001$ ) and OS (31.5 months=0.016)<br>than those with PET/CT stageIII (PFS 18 months,<br>median OS 37.5 months). Debulking lesions did<br>not improve PFS ( $p=0.425$ ) and OS ( $p=0.465$ ) of<br>patients with AEOC.                                                                      |
| 27 | Mert I.<br>et al.<br>2018                 | Retrospec<br>tive<br>cohort | 253<br>(28)  | IIIC-<br>IV | Mayo clinic,<br>USA                                                                                                               | Qualitative<br>assessment<br>score 4 or 5,<br>>7 mm. and<br>≥10 mm. in<br>short axis<br>diameter on CT<br>scan                   | To investigate the<br>prognostic<br>significance of<br>enlarged CPLN<br>detected by<br>preoperative CT<br>scan.                                                           | Enlarged CPLN was associated with decreased OS<br>(median OS 38.4 vs 69.6 months $P=0.08$ ). No<br>association between enlarged CPLN and OS<br>among patients with residual disease (RD) was<br>observed (median OS 37.5 vs 28.5 months,<br>$p=0.49$ ). There was no difference in OS between<br>patients with NGR VS RD when enlarged CPLN<br>were present (median OS 38.4 vs 37.5 months,<br>$p=0.99$ ) |
| 34 | Nuruzza<br>man Md.<br>S. H et<br>al. 2018 | Case<br>report              | 1<br>(1)     | IVB         | Singapore<br>general<br>hospital                                                                                                  | -                                                                                                                                | To report case of<br>complete<br>cytoreduction<br>including CPLN<br>excision.                                                                                             | Transdiaphragmatic excision of CPLN is feasible<br>without major complication. No correlation with<br>OS or PFS yet.                                                                                                                                                                                                                                                                                      |
| 28 | Salehi S.<br>et al.<br>2018               | Retrospec<br>tive<br>cohort | 180<br>(24)  | IIIC-<br>IV | Skane<br>University<br>Hospital,<br>Lund,<br>Sweden                                                                               | >8mm. in short<br>axis diameter<br>or<br>heterogenous<br>enhancement or<br>absence of fatty<br>hilum or a<br>lobulated<br>margin | To evaluate the<br>accuracy of<br>preoperative imaging<br>in the diagnosis of<br>CPLN metastases<br>and to report<br>perioperative<br>outcomes after<br>resection of CPLN | 20/24 had confirmed metastases upon final<br>pathology. CPLN resection is highly feasible<br>without considerable added morbidity.                                                                                                                                                                                                                                                                        |
| 11 | Lopes A.<br>et al.<br>2019                | Retrospec<br>tive<br>cohort | 456<br>(14)  | IIIC-IV     | The Instituto<br>Brasileiro de<br>Controle do<br>Cancer and<br>the Instituto<br>do Cancer do<br>Estado de<br>Sao Paulo,<br>Brazil | > 8mm. in<br>short axis<br>on CT or MRI<br>or 18-<br>fluorine<br>fluorodeoxyglu<br>cose uptake<br>on PET-CT                      | To evaluate the<br>clinical outcomes of<br>patients who<br>underwent CPLN<br>resection                                                                                    | 21/24 patients had CPLN positive. The median<br>PFS and OS was 12 (95%CI 7.2-16.7) months and<br>30 (95%CL 22.5 to 37.4) months, respectively.                                                                                                                                                                                                                                                            |
| 29 | Prader S.<br>et al.<br>2019               | Retrospec<br>tive<br>cohort | 350<br>(217) | IIIB-<br>IV | Kliniken<br>Essen-Mitte,<br>Germany                                                                                               | ≥5mm in short<br>axis diameter<br>on CT scans                                                                                    | To evaluate the<br>pattern of CPLN<br>metastases, their<br>prognostic impact<br>and the potential role<br>of CPLN resection.                                              | In patient with complete resection, negative CPLN<br>had a 5-year OS 69% vs positive CPLN had 5-<br>year OS 30%. Patients with negative CPLN had a<br>5-year PFS of 41% positive CPLN vs 13%. 52/217<br>who were resected CPLN match pair case control<br>analysis did not show any significant increase of<br>OS after CPLN resection.                                                                   |
| 35 | Pinelli<br>C. et al.<br>2019              | Case<br>series              | 7<br>(7)     | IV          | Churchill<br>Hospital<br>Oxford, UK                                                                                               | ≥7 mm in short<br>axis diameter<br>on CT scans                                                                                   | To investigate the<br>accuracy and<br>feasibility of CPLN<br>assessment and<br>removal during IDS<br>after NACT                                                           | The result confirms that CPLN resection can be<br>performed safely in the context of IDS when is<br>essential to achieve an optimal cytoreduction.                                                                                                                                                                                                                                                        |
| 31 | Luger K.<br>A. et al.<br>2020             | Retrospec<br>tive<br>cohort | 178<br>(89)  | III-IV      | Innsbruck<br>medical<br>University,<br>Austria                                                                                    | ≥5 mm.<br>in short axis<br>diameter on CT<br>scan                                                                                | To evaluate the<br>clinical impact of<br>preoperative<br>radiologic assessment<br>of CPLN status.                                                                         | CPLN≥5mm revealed independent prognostic<br>relevance for PFS HR2.14 (95%CI1.33-3.42) and<br>OS (HR2.18 95%CI1.16-4.08). Patients with<br>enlarged CPLN nonetheless benefit from complete<br>intra-abdominal tumor debulking in terms of an<br>improvement in PFS HR 0.60 (95%CI 0.38-0.94)<br>and OS HR 0.59 95%CI 0.35-0.82).                                                                           |
| 32 | Oommen<br>I. et<br>al.2020                | Retrospec<br>tive<br>cohort | 101<br>(42)  | I-IV        | Christian<br>Medical<br>College,<br>India                                                                                         | ≥7 mm in short<br>axis diameter<br>on CT scans                                                                                   | To assess the<br>relevance of enlarged<br>Cardiophrenic lymph                                                                                                             | Enlarged CPLN was significantly associated with<br>higher radiological PCI ( $p=0.002$ ), large volume<br>upper abdominal disease ( $p=0.001$ ), enlarged<br>lesser omental, periportal and suprarenal para-                                                                                                                                                                                              |

nodes seen on staging aortic lymph nodes ( $p \leq 0.05$ ), unfavorable sites of disease involvement ( $p < 0.001$ ), and extraperitoneal metastases ( $p = 0.004$ ). CT detected enlarge CPLN did not adversely affect OS, HR 1.5,  $p = 0.272$  but adversely affected PFS, HR 2.38,  $p = 0.008$

**Table S4.** The association between radiologically suspicious CPLN and histologically confirmed CPLN. CPLN; Cardio-phrenic lymph nodes, \*Patients underwent neoadjuvant chemotherapy 3-6 cycles before debulking surgery.

| Study                   | Number of patients with CPLN resection | Definition of CPLN adenopathy on short axis CT scan (mm) | Mean size of CPLN (mm) | SD   | Histological confirmation (%) |
|-------------------------|----------------------------------------|----------------------------------------------------------|------------------------|------|-------------------------------|
| Kim H. T. et al. 2016   | 31                                     | $>7$                                                     | 7                      | 2.26 | 19 (61.3)                     |
| Cowan R. A. et al. 2017 | 54                                     | $>5$                                                     | 15                     | 0.5  | 51(94.4)                      |
| Lee O. I. et al. 2018   | 25                                     | FDG uptake                                               | 8.05                   | 2.6  | 21(84)                        |
| Salehi S. et al. 2018   | 24                                     | $>8$                                                     | 8.8                    | 2.7  | 20(83.3)                      |
| Prader S. et al. 2019   | 52                                     | $\geq 5$                                                 | 8.5                    | 2.9  | 44(84.6)                      |
| Pinelli C. et al. 2019* | 7                                      | $>7$ and intraoperative bulky nodes                      | -                      | -    | 4(57.14)                      |

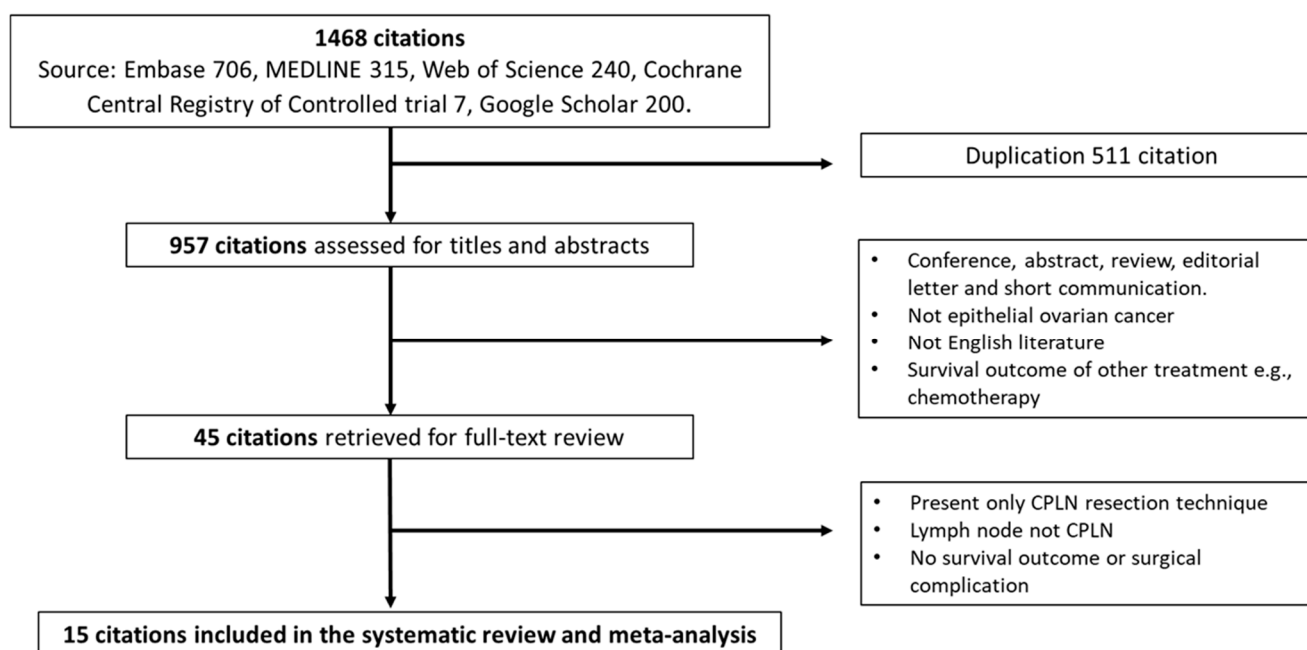

**Figure S1.** Flow diagram of study selection.

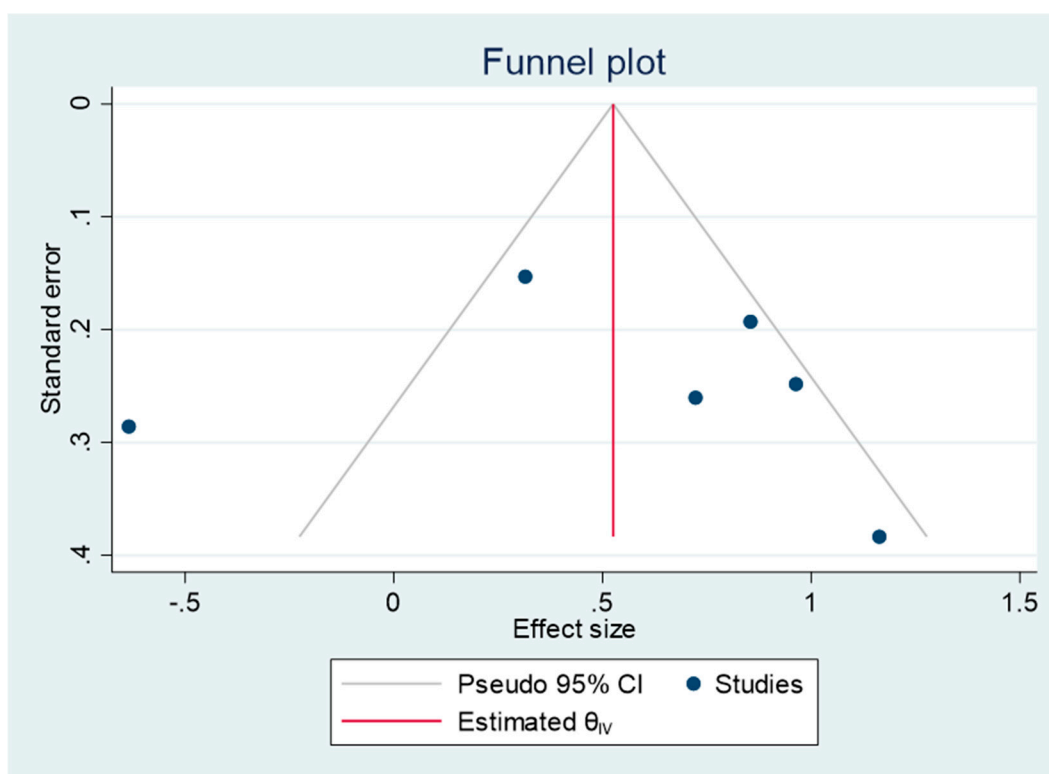

**Figure S2.** Funnel plot, using data from 6 studies of 5-year mortality in advanced stage EOC with CPLN adenopathy.

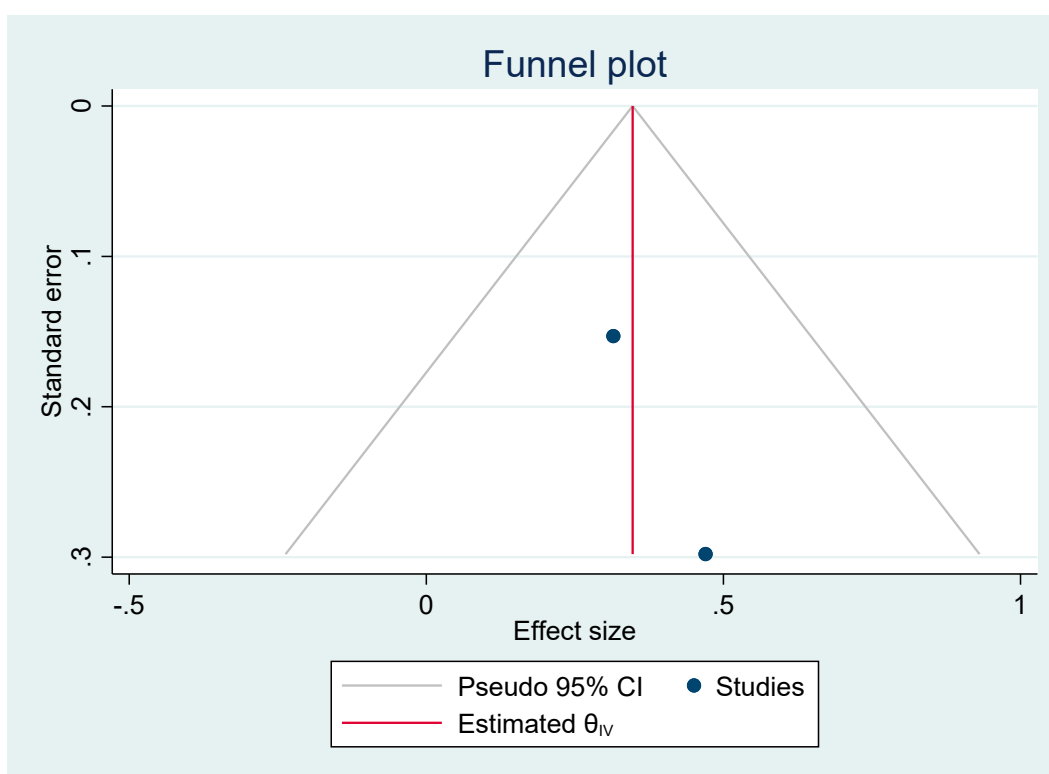

**Figure S3.** Funnel plot, using data from 2 studies of 5-year mortality in advanced stage EOC with CPLN adenopathy after optimal abdominal cytoreductive surgery.

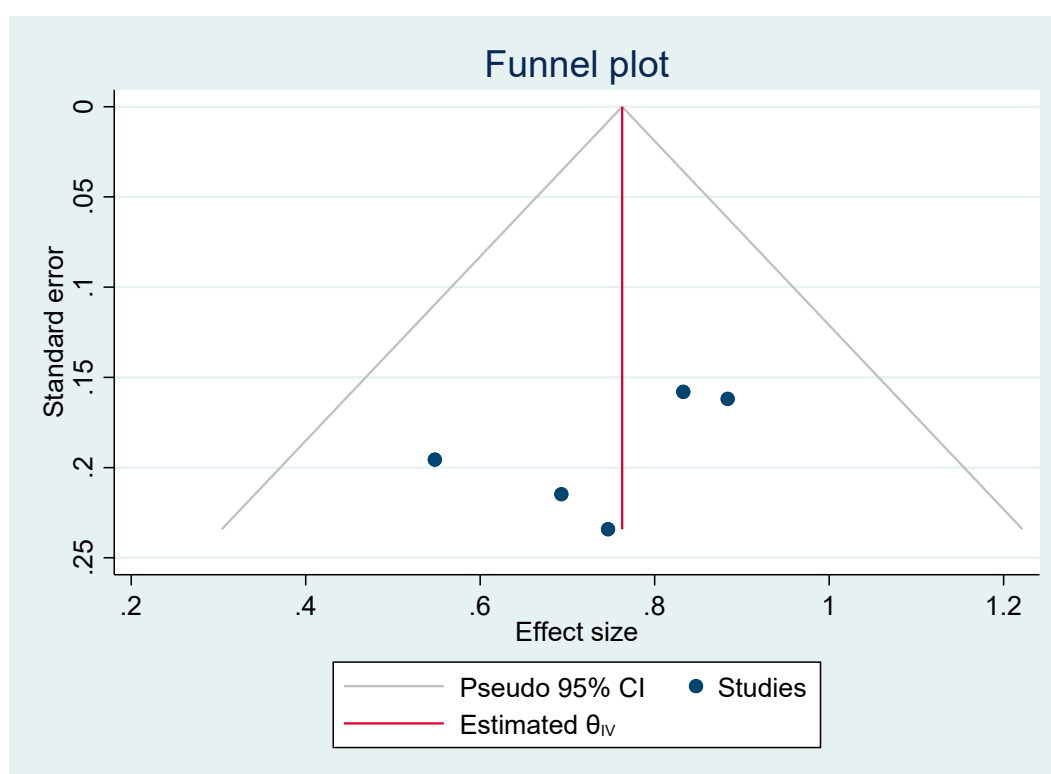

**Figure S4.** Funnel plot, using data from 5 studies of 5-year disease free survival in advanced stage EOC with CPLN adenopathy.
